# Supplementary material for: Single‐cell atlas of peripheral blood mononuclear cells from pregnant women
Source: PubMed Central journal article supplement (PMC9076016; doi:10.1002/ctm2.821), 2022-05-06
Supplement: CTM2-12-e821-s001.pdf [file CTM2-12-e821-s001.pdf]

## Supplementary Materials for

### Single-cell atlas of peripheral blood mononuclear cells from pregnant women

Dongsheng Chen<sup>†</sup>, Wei Wang<sup>†</sup>, Linlin Wu<sup>†</sup>, Langchao Liang<sup>†</sup>, Shiyong Wang<sup>†</sup>, Yunfeng Cheng<sup>†</sup>, Tongda Zhang, Chaochao Chai, Qihong Luo, Chengcheng Sun, Wandong Zhao, Zhiyuan Lv, Ya Gao, Xiaoxia Wu, Ning Sun, Yiwei Zhang, Jing Zhang, Yixuan Chen, Jianing Tong, Xiangdong Wang<sup>\*</sup>, Yong Bai<sup>\*</sup>, Chaoyang Sun<sup>\*</sup>, Xin Jin<sup>\*</sup>, Jianmin Niu<sup>\*</sup>

#### **This file includes:**

Figure S1. Single cell data display for each library and GO term for all cell types (related to Figure 1)

Figure S2. Transcriptomic profiling of NK cells and monocytes during pregnancy (related to Figure 3)

Figure S3. Transcriptomic profiling of T cells throughout gestation (related to Figure 4)

Figure S4. Changes in B cell activity during pregnancy (related to Figure 5)

Figure S5. PBMC cell communication in pregnancy and non-pregnancy (related to Figure 6)

Figure S6. Enriched GO terms for genes involved in the five cell-type-specific models toward gestational age prediction (related to Figure 7)

Table S1. Basic information of the enrolled subjects (related to Figure 1)

Table S2. Cell composition of each sample (related to Figure 2)

Table S3. Machine learning model (related to Figure 7)



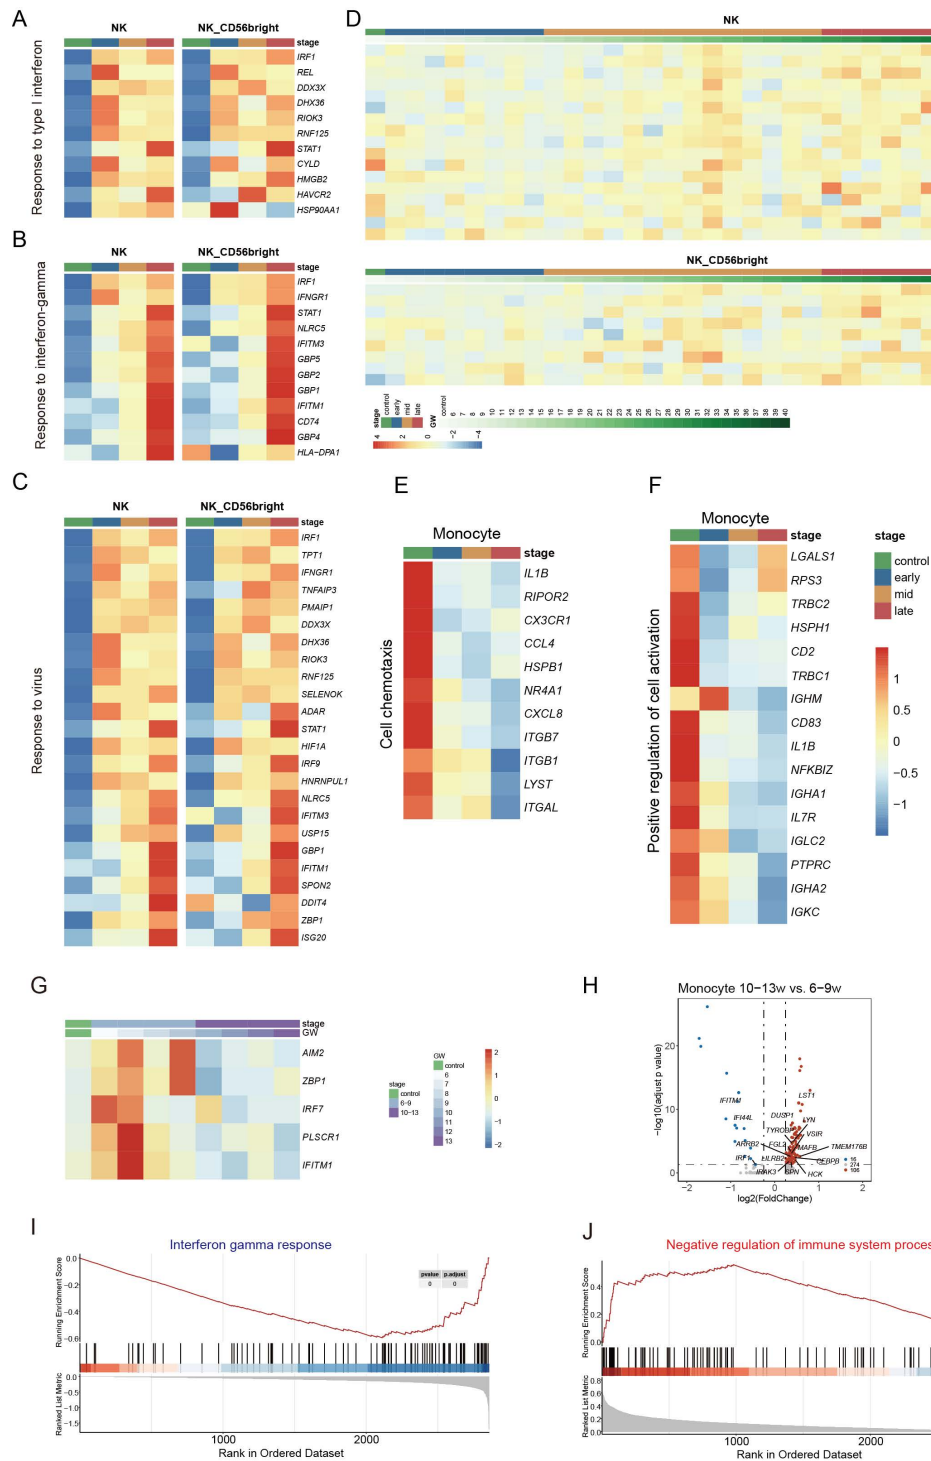

**FIGURE S2** Transcriptomic profiling of NK cells and monocytes during pregnancy (related to Figure 3). (A) Heatmap of DEGs enriched in “response to type I interferon”, (B) “response to interferon-gamma”, (C) “response to virus” in NK/NK\_CD56bright cells across four conditions. Colors represent scaled genes expression level, and higher expression is red and lower expression is blue. (D) Heatmap of ISGs across four stages in NK/NK\_CD56bright cells. Colors represent scaled genes expression level, and higher expression is red and lower expression is blue. (E-F) Heatmap of DEGs enriched in “cell chemotaxis”, “positive regulation of cell activation” across four stages in monocytes. (G) Heatmap of the ISGs, including *AIM2*, *ZBP1*, *IRF7*, *PLSCR1* and *IFITM1* in monocytes derived from GW6-13 and pre-pregnant control samples. (H) Volcano



signaling pathway”, “T cell activation” in T cells across four conditions. (E-F) Dot plot showing expression of genes associated with exhausted and cytotoxic in T cells across four conditions. (G-I) Heatmap of DEGs enriched in “type I interferon production”, “response to interferon-gamma”, “response to virus” in T cells across four conditions. (J) Heatmap of ISGs among every gestational week. Colors represent scaled genes expression level, and higher expression is red and lower expression is blue. (K) Heatmap of DEGs enriched in “RNA splicing” in T cells across four conditions.



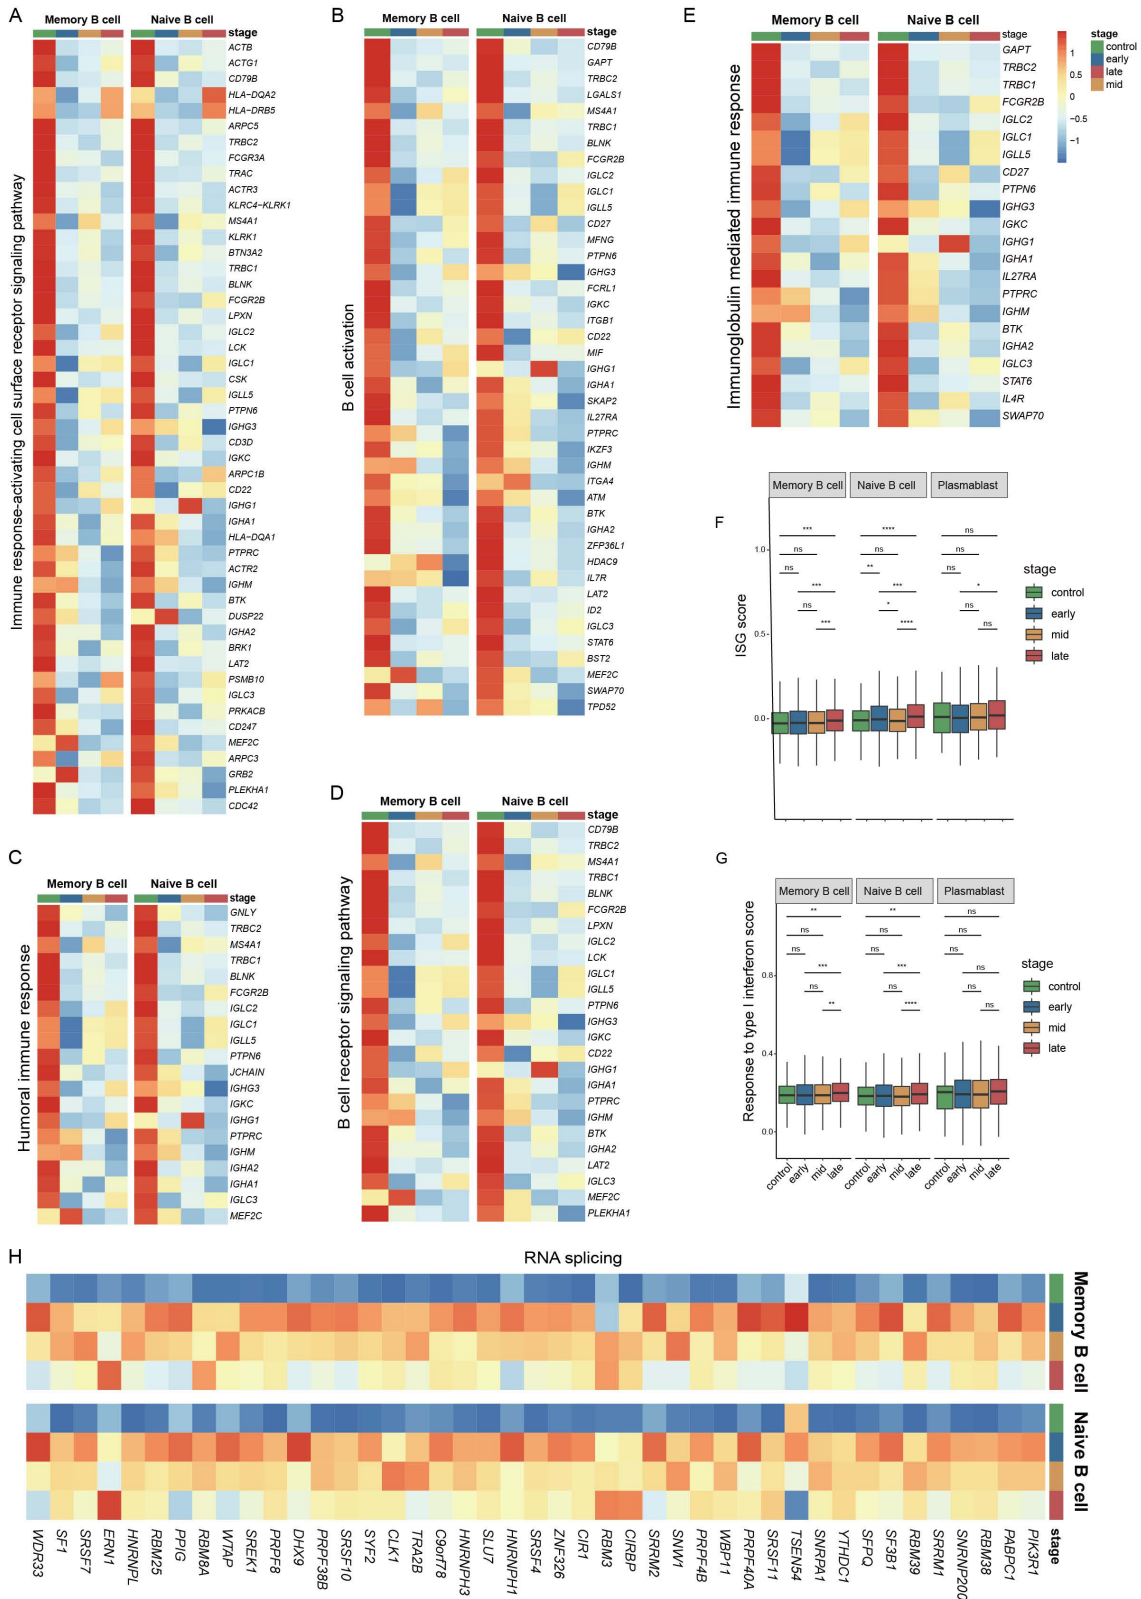

**FIGURE S4** Changes in B cell activity during pregnancy (related to Figure 5). (A) Heatmap of DEGs enriched in "immune response-activating cell surface receptor signaling pathway", (B) "B cell activation", (C) "humoral immune response", (D) "B cell receptor signaling pathway", (E) "immunoglobulin mediated immune response" in Naïve/Memory B cells across four conditions. (F) Box plots of the collected ISGs scores across different clusters and conditions. Statistical significance of difference in pairs among four pregnant stages were labeled at the top of box plot.

Wilcoxon rank-sum test was applied. (G) Box plots of the cell scores of GO biological process terms (response to type I interferon) in B cells across four conditions. Wilcoxon rank-sum test was applied. All differences with  $p < 0.05$  are indicated. \* $p < 0.05$ , \*\* $p < 0.01$ , \*\*\* $p < 0.001$ , \*\*\*\* $p < 0.0001$ , ns= not significant. (H) Heatmap of DEGs enriched in “RNA splicing” in Naïve/Memory B cells across four conditions.

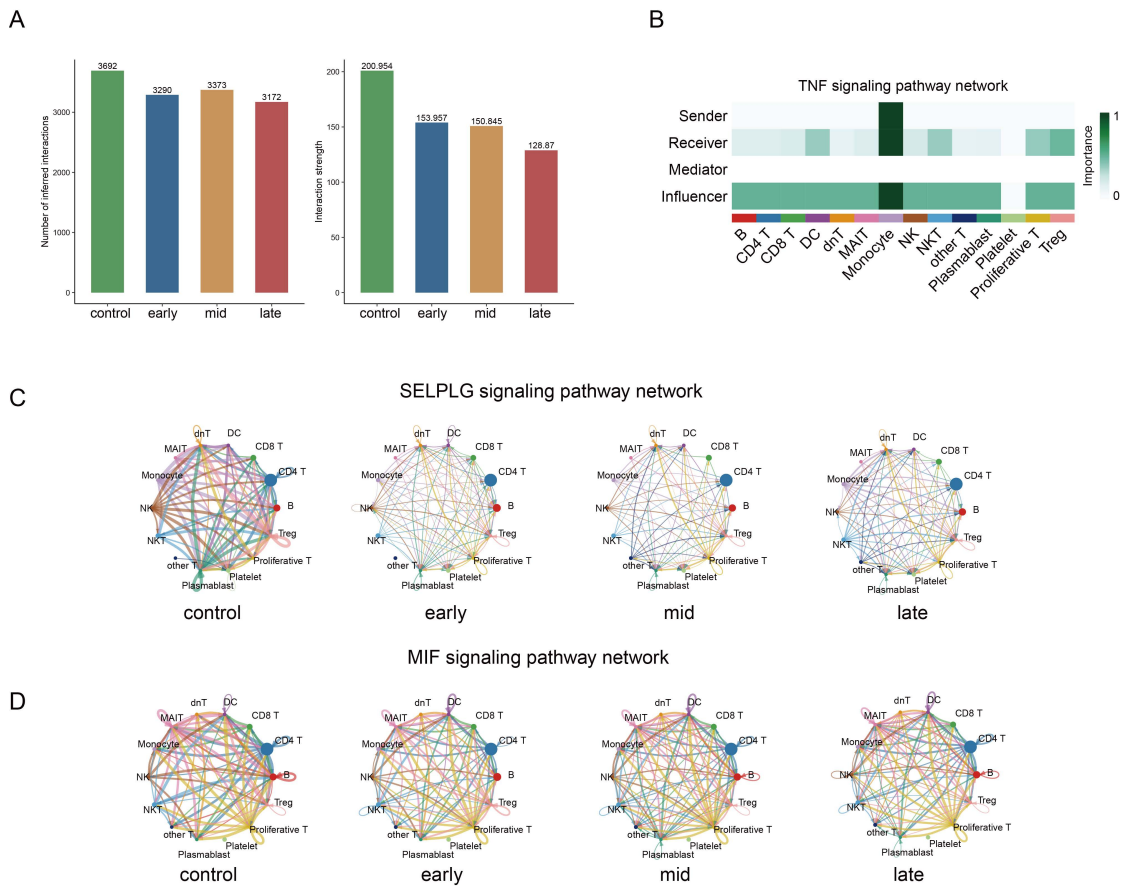

**FIGURE S5** PBMC cell communication in pregnancy and non-pregnancy (related to Figure 6). (A) The bar chart shows that the total number of interactions of the inferred cell-cell communication networks from different conditions. (B) Heatmap shows centrality scores of TNF signaling pathway network. (C-D) SELPLG signaling pathway network and MIF signaling pathway network in different conditions.

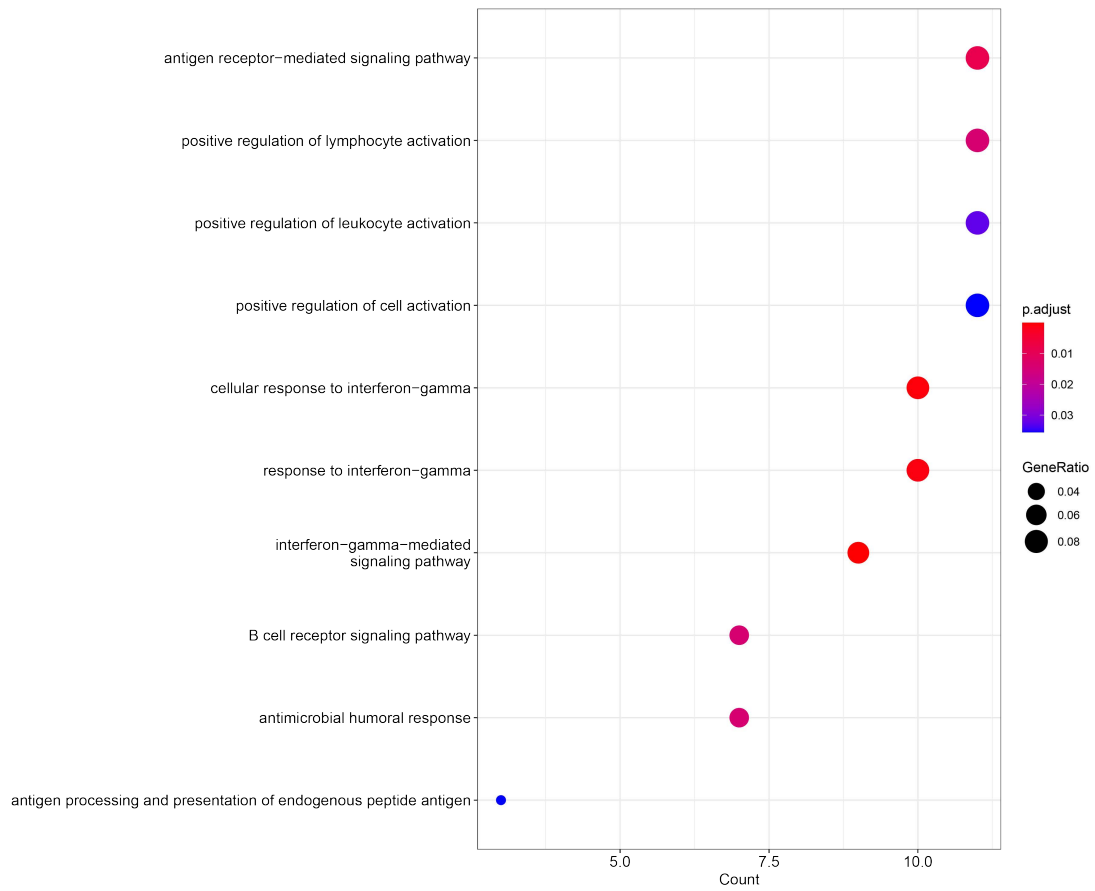

**FIGURE S6** Enriched GO terms for genes involved in the five cell-type-specific models toward gestational age prediction (related to Figure 7)



**Supplementary Table 1. Basic information of the enrolled subjects**

|                                                                | Control              | Early                                | Mid                                    | Late                                  |
|----------------------------------------------------------------|----------------------|--------------------------------------|----------------------------------------|---------------------------------------|
|                                                                | non-pregnancy<br>N=5 | the first trimester (GW6-13)<br>N=34 | the second trimester (GW14-27)<br>N=52 | the third trimester (GW28-40)<br>N=45 |
| <b>Demographics</b>                                            |                      |                                      |                                        |                                       |
| Age, years                                                     | 25±1.9               | 29.7±2.7                             | 28.7±2.6                               | 28.7±3.2                              |
| BMI, kg/m <sup>2</sup>                                         | 22.85±3.05           | 20.65±2.01                           | 22.51±1.95                             | 25.62±2.47                            |
| <b>Previous births, No. (%)</b>                                |                      |                                      |                                        |                                       |
| Yes                                                            | 0(0)                 | 0(0)                                 | 0(0)                                   | 0(0)                                  |
| No                                                             | 5(100)               | 34(100)                              | 52(100)                                | 45(100)                               |
| <b>Abortion, drug abortion, and ectopic pregnancy, No. (%)</b> |                      |                                      |                                        |                                       |
| Yes                                                            | 0(0)                 | 0(0)                                 | 0(0)                                   | 0(0)                                  |
| No                                                             | 5(100)               | 34(100)                              | 52(100)                                | 45(100)                               |
| <b>Pregnancy complications, No. (%)</b>                        |                      |                                      |                                        |                                       |
| Yes                                                            | 0(0)                 | 0(0)                                 | 0(0)                                   | 0(0)                                  |
| No                                                             | 5(100)               | 34(100)                              | 52(100)                                | 45(100)                               |
| <b>Immune system diseases, No. (%)</b>                         |                      |                                      |                                        |                                       |
| Yes                                                            | 0(0)                 | 0(0)                                 | 0(0)                                   | 0(0)                                  |
| No                                                             | 5(100)               | 34(100)                              | 52(100)                                | 45(100)                               |
| <b>Appears during pregnancy, No. (%)</b>                       |                      |                                      |                                        |                                       |
| <b>Subclinical hypothyroidism</b>                              |                      |                                      |                                        |                                       |
| Yes                                                            | 0(0)                 | 0(0)                                 | 0(0)                                   | 0(0)                                  |
| No                                                             | 5(100)               | 34(100)                              | 52(100)                                | 45(100)                               |
| <b>ICP</b>                                                     |                      |                                      |                                        |                                       |
| Yes                                                            | 0(0)                 | 0(0)                                 | 0(0)                                   | 0(0)                                  |
| No                                                             | 5(100)               | 34(100)                              | 52(100)                                | 45(100)                               |
| <b>GDM</b>                                                     |                      |                                      |                                        |                                       |
| Yes                                                            | 0(0)                 | 0(0)                                 | 0(0)                                   | 0(0)                                  |
| No                                                             | 5(100)               | 34(100)                              | 52(100)                                | 45(100)                               |
| <b>HDP</b>                                                     |                      |                                      |                                        |                                       |
| Yes                                                            | 0(0)                 | 0(0)                                 | 0(0)                                   | 0(0)                                  |
| No                                                             | 5(100)               | 34(100)                              | 52(100)                                | 45(100)                               |
| <b>Gestational thrombocytopenia</b>                            |                      |                                      |                                        |                                       |
| Yes                                                            | 0(0)                 | 0(0)                                 | 0(0)                                   | 0(0)                                  |
| No                                                             | 5(100)               | 34(100)                              | 52(100)                                | 45(100)                               |
| <b>FGR</b>                                                     |                      |                                      |                                        |                                       |
| Yes                                                            | 0(0)                 | 0(0)                                 | 0(0)                                   | 0(0)                                  |
| No                                                             | 5(100)               | 34(100)                              | 52(100)                                | 45(100)                               |
| <b>Macrosomia</b>                                              |                      |                                      |                                        |                                       |
| Yes                                                            | 0(0)                 | 0(0)                                 | 0(0)                                   | 0(0)                                  |
| No                                                             | 5(100)               | 34(100)                              | 52(100)                                | 45(100)                               |

ICP: intrahepatic cholestasis of pregnancy, GDM: gestational diabetes mellitus, HDP: hypertensive disorders of pregnancy, FGR: fetal growth restriction

**Supplementary Table 2. Gestational weeks and cell ratio of all subjects**

| Sample              | Stage   | Gestational weeks | CD4+ Cytotoxic T | CD4+ Naive T | CD8+ Cytotoxic T | CD8+ Naive T | DC8    | dnt    | M2AF  | Memory B cell | Naive B cell | NK    | NK_CD56bright | NKT   | other T | Plasmablast | Platelet | Proliferative T | Ostreg |       |
|---------------------|---------|-------------------|------------------|--------------|------------------|--------------|--------|--------|-------|---------------|--------------|-------|---------------|-------|---------|-------------|----------|-----------------|--------|-------|
| control_1_control   | control | 1.28%             | 2.39%            | 12.22%       | 35.53%           | 14.85%       | 6.88%  | 7.95%  | 2.46% | 28.4%         | 0.80%        | 2.53% | 8.94%         | 1.29% | 0.95%   | 0.04%       | 0.34%    | 0.23%           | 0.53%  | 0.87% |
| control_2_control   | control | 3.01%             | 13.84%           | 38.28%       | 13.84%           | 0.36%        | 7.35%  | 2.37%  | 3.96% | 0.31%         | 3.22%        | 9.35% | 1.07%         | 0.87% | 0.00%   | 0.23%       | 0.18%    | 0.46%           | 1.30%  | 1.26% |
| control_1_1_control | control | 2.28%             | 19.94%           | 19.37%       | 28.47%           | 0.57%        | 14.19% | 2.73%  | 2.00% | 0.29%         | 1.06%        | 4.45% | 1.14%         | 1.26% | 0.00%   | 0.61%       | 0.24%    | 0.12%           | 1.26%  | 1.28% |
| control_2_1_control | control | 2.56%             | 19.17%           | 15.44%       | 28.42%           | 0.59%        | 17.99% | 3.64%  | 2.16% | 0.49%         | 0.88%        | 4.52% | 0.98%         | 1.18% | 0.00%   | 0.29%       | 0.10%    | 0.29%           | 1.28%  | 1.82% |
| control_3_1_control | control | 2.43%             | 16.13%           | 22.91%       | 16.88%           | 0.65%        | 13.65% | 4.53%  | 2.66% | 3.23%         | 5.28%        | 6.50% | 0.51%         | 0.56% | 1.54%   | 0.33%       | 0.05%    | 0.33%           | 1.82%  | 1.21% |
| control_3_2_control | control | 2.51%             | 17.67%           | 24.40%       | 17.24%           | 0.72%        | 14.39% | 5.65%  | 2.61% | 1.50%         | 4.78%        | 5.84% | 0.58%         | 0.72% | 0.00%   | 0.19%       | 0.00%    | 0.39%           | 1.21%  | 1.60% |
| control_4_1_control | control | 3.01%             | 15.02%           | 20.48%       | 18.71%           | 0.44%        | 10.29% | 3.30%  | 2.59% | 3.5%          | 3.55%        | 4.14% | 0.63%         | 1.32% | 0.00%   | 0.28%       | 0.13%    | 0.28%           | 1.60%  | 1.60% |
| control_2_2_control | control | 3.59%             | 14.53%           | 24.00%       | 20.25%           | 0.28%        | 9.65%  | 3.98%  | 2.58% | 0.06%         | 1.29%        | 10.9% | 1.18%         | 1.07% | 0.06%   | 0.17%       | 0.06%    | 0.34%           | 2.02%  | 2.02% |
| control_5_1_control | control | 2.06%             | 14.06%           | 24.32%       | 20.40%           | 0.33%        | 17.91% | 2.75%  | 2.81% | 0.95%         | 2.84%        | 7.32% | 0.49%         | 0.82% | 0.00%   | 0.13%       | 0.26%    | 0.42%           | 2.09%  | 2.09% |
| control_5_2_control | control | 2.06%             | 14.95%           | 21.92%       | 20.45%           | 0.23%        | 18.29% | 3.30%  | 3.03% | 0.83%         | 4.59%        | 6.65% | 0.55%         | 0.83% | 0.00%   | 0.00%       | 0.05%    | 0.23%           | 2.06%  | 2.06% |
| NP150               | 6       | early             | 3.15%            | 16.61%       | 28.23%           | 19.14%       | 0.79%  | 12.76% | 2.27% | 1.49%         | 4.28%        | 0.96% | 5.68%         | 1.14% | 1.22%   | 0.09%       | 0.35%    | 0.00%           | 0.61%  | 1.22% |
| NP151               | 6       | early             | 1.34%            | 16.68%       | 11.12%           | 26.27%       | 0.96%  | 15.82% | 4.31% | 2.49%         | 4.99%        | 4.31% | 6.33%         | 2.11% | 0.29%   | 0.00%       | 0.77%    | 0.00%           | 0.48%  | 1.73% |
| NP152               | 6       | early             | 2.21%            | 18.38%       | 13.21%           | 15.83%       | 0.96%  | 9.69%  | 3.50% | 3.41%         | 1.92%        | 5.61% | 11.57%        | 0.72% | 1.01%   | 0.00%       | 0.91%    | 0.00%           | 1.10%  | 2.16% |
| NP153               | 6       | early             | 2.00%            | 15.91%       | 21.69%           | 16.69%       | 1.11%  | 13.79% | 5.23% | 2.00%         | 2.22%        | 3.23% | 11.35%        | 0.89% | 1.11%   | 0.22%       | 0.11%    | 0.44%           | 0.89%  | 1.11% |
| NP115               | 7       | early             | 1.17%            | 12.37%       | 25.91%           | 16.97%       | 1.04%  | 15.28% | 4.99% | 2.53%         | 2.98%        | 4.53% | 7.12%         | 1.10% | 0.84%   | 0.39%       | 1.36%    | 0.06%           | 0.26%  | 1.10% |
| NP120               | 7       | early             | 2.51%            | 13.28%       | 20.87%           | 20.15%       | 0.53%  | 11.76% | 6.27% | 3.24%         | 1.32%        | 4.36% | 11.56%        | 1.25% | 0.59%   | 0.07%       | 0.33%    | 0.00%           | 0.33%  | 1.59% |
| NP124               | 7       | early             | 1.70%            | 18.93%       | 25.33%           | 21.28%       | 0.26%  | 13.45% | 1.83% | 1.44%         | 1.83%        | 1.31% | 8.88%         | 0.52% | 0.39%   | 0.00%       | 0.52%    | 0.26%           | 0.52%  | 1.57% |
| NP17                | 7       | early             | 2.30%            | 18.92%       | 19.81%           | 17.68%       | 0.51%  | 12.02% | 1.75% | 1.45%         | 6.26%        | 3.03% | 10.52%        | 1.11% | 0.60%   | 0.00%       | 0.47%    | 0.04%           | 1.36%  | 2.17% |
| NP178               | 8       | early             | 2.46%            | 15.02%       | 20.48%           | 18.71%       | 0.44%  | 10.29% | 3.30% | 2.59%         | 3.5%         | 3.55% | 4.14%         | 0.63% | 1.32%   | 0.00%       | 0.28%    | 0.13%           | 0.28%  | 1.60% |
| NP111               | 8       | early             | 2.75%            | 19.08%       | 27.62%           | 11.58%       | 0.67%  | 8.69%  | 5.35% | 4.33%         | 3.20%        | 2.75% | 6.98%         | 1.56% | 1.04%   | 0.00%       | 0.89%    | 0.00%           | 0.30%  | 0.74% |
| NP117               | 8       | early             | 2.95%            | 14.90%       | 29.60%           | 20.13%       | 0.40%  | 16.64% | 2.01% | 2.89%         | 0.20%        | 2.89% | 4.09%         | 0.54% | 1.41%   | 0.00%       | 0.13%    | 0.00%           | 0.07%  | 1.14% |
| NP130               | 8       | early             | 2.01%            | 17.16%       | 34.74%           | 8.37%        | 1.04%  | 7.89%  | 3.25% | 2.84%         | 3.74%        | 3.46% | 10.24%        | 0.35% | 1.11%   | 1.04%       | 0.69%    | 0.07%           | 0.42%  | 1.59% |
| NP75                | 8       | early             | 3.47%            | 19.96%       | 24.83%           | 18.77%       | 1.26%  | 14.12% | 4.73% | 1.33%         | 2.22%        | 0.44% | 5.40%         | 1.26% | 0.30%   | 0.00%       | 0.52%    | 0.00%           | 0.22%  | 1.18% |
| NP54                | 9       | early             | 2.13%            | 30.98%       | 23.11%           | 15.57%       | 1.15%  | 11.64% | 0.98% | 2.30%         | 1.48%        | 1.31% | 4.59%         | 1.48% | 0.66%   | 0.00%       | 0.66%    | 0.00%           | 0.16%  | 1.80% |
| NP65                | 9       | early             | 1.68%            | 9.02%        | 29.64%           | 8.80%        | 0.56%  | 7.17%  | 3.87% | 3.36%         | 3.64%        | 6.16% | 16.13%        | 0.84% | 0.73%   | 5.27%       | 0.22%    | 0.00%           | 2.07%  | 0.84% |
| NP74                | 9       | early             | 2.84%            | 14.48%       | 32.25%           | 17.17%       | 0.56%  | 10.73% | 5.85% | 2.57%         | 0.8%         | 1.06% | 6.47%         | 1.12% | 1.51%   | 0.00%       | 0.24%    | 0.00%           | 0.21%  | 2.04% |
| NP79                | 9       | early             | 2.27%            | 30.24%       | 17.03%           | 12.90%       | 0.83%  | 6.91%  | 1.46% | 4.44%         | 0.93%        | 2.66% | 11.15%        | 0.40% | 0.31%   | 0.10%       | 0.31%    | 0.00%           | 2.06%  | 0.00% |
| NP104               | 10      | early             | 2.55%            | 22.90%       | 24.36%           | 20.28%       | 1.02%  | 12.55% | 4.60% | 1.82%         | 0.44%        | 2.19% | 3.21%         | 0.44% | 0.88%   | 0.00%       | 0.15%    | 0.00%           | 0.88%  | 1.75% |
| NP108               | 10      | early             | 3.11%            | 23.94%       | 27.98%           | 8.99%        | 0.64%  | 6.80%  | 6.29% | 2.21%         | 1.67%        | 1.73% | 12.80%        | 0.17% | 0.67%   | 0.00%       | 0.39%    | 0.03%           | 0.42%  | 1.44% |
| NP6                 | 10      | early             | 1.80%            | 21.82%       | 19.73%           | 19.07%       | 0.85%  | 13.09% | 7.12% | 2.47%         | 1.71%        | 1.71% | 6.26%         | 1.42% | 1.04%   | 0.09%       | 0.00%    | 0.00%           | 0.38%  | 1.42% |
| NP57                | 10      | early             | 4.56%            | 26.03%       | 23.68%           | 14.85%       | 0.29%  | 12.79% | 3.97% | 3.82%         | 1.76%        | 1.47% | 3.09%         | 0.29% | 0.44%   | 0.00%       | 0.44%    | 0.00%           | 0.74%  | 1.76% |
| NP103               | 10      | early             | 3.05%            | 19.06%       | 30.43%           | 11.25%       | 0.95%  | 9.97%  | 4.32% | 1.02%         | 1.8%         | 0.32% | 10.93%        | 0.27% | 1.08%   | 0.06%       | 0.64%    | 0.00%           | 1.08%  | 1.08% |
| NP123               | 11      | early             | 2.18%            | 17.49%       | 25.45%           | 22.97%       | 0.15%  | 12.61% | 5.33% | 1.65%         | 1.20%        | 1.50% | 5.33%         | 1.13% | 0.75%   | 0.00%       | 0.38%    | 0.08%           | 0.15%  | 1.65% |
| NP56                | 11      | early             | 2.08%            | 15.74%       | 26.94%           | 22.77%       | 0.72%  | 11.32% | 3.97% | 2.21%         | 1.37%        | 1.11% | 6.70%         | 0.78% | 1.37%   | 0.07%       | 0.78%    | 0.00%           | 0.85%  | 1.24% |
| NP57                | 11      | early             | 4.79%            | 18.34%       | 20.60%           | 17.18%       | 0.82%  | 13.69% | 1.98% | 3.83%         | 1.23%        | 4.18% | 9.17%         | 0.75% | 0.62%   | 0.00%       | 1.03%    | 0.34%           | 0.21%  | 1.23% |
| NP94                | 11      | early             | 2.43%            | 19.61%       | 35.33%           | 13.18%       | 0.54%  | 8.75%  | 4.11% | 3.84%         | 0.81%        | 3.08% | 4.70%         | 0.27% | 0.54%   | 0.00%       | 0.97%    | 0.00%           | 0.49%  | 1.35% |
| NP10                | 12      | early             | 1.61%            | 16.83%       | 26.58%           | 20.76%       | 0.91%  | 14.52% | 4.98% | 1.33%         | 0.28%        | 1.19% | 4.70%         | 0.84% | 0.42%   | 0.00%       | 1.68%    | 0.00%           | 0.35%  | 3.02% |
| NP121               | 12      | early             | 3.55%            | 22.04%       | 25.82%           | 17.16%       | 0.36%  | 15.03% | 2.47% | 2.65%         | 1.0%         | 1.53% | 2.22%         | 0.67% | 0.28%   | 0.00%       | 0.22%    | 0.07%           | 0.28%  | 1.58% |
| NP10                | 12      | early             | 3.01%            | 15.88%       | 23.63%           | 16.42%       | 1.46%  | 14.05% | 7.48% | 1.09%         | 2.92%        | 1.30% | 7.66%         | 1.00% | 0.82%   | 0.00%       | 0.09%    | 0.00%           | 0.27%  | 1.09% |
| NP92                | 12      | early             | 4.83%            | 23.57%       | 22.69%           | 16.92%       | 0.65%  | 10.27% | 3.86% | 3.44%         | 0.84%        | 3.67% | 4.60%         | 1.12% | 0.74%   | 0.05%       | 0.70%    | 0.00%           | 0.46%  | 1.58% |
| NP119               | 13      | early             | 3.10%            | 18.43%       | 29.59%           | 18.55%       | 0.31%  | 13.32% | 2.12% | 2.87%         | 0.28%        | 3.77% | 3.22%         | 0.79% | 1.34%   | 0.00%       | 0.20%    | 0.04%           | 0.43%  | 1.65% |
| NP52                | 13      | early             | 2.01%            | 18.25%       | 20.55%           | 24.71%       | 0.57%  | 15.80% | 3.16% | 0.72%         | 2.44%        | 3.02% | 4.74%         | 0.86% | 1.01%   | 0.00%       | 0.57%    | 0.00%           | 0.72%  | 0.86% |
| NP77                | 13      | early             | 3.40%            | 21.69%       | 30.88%           | 16.94%       | 0.44%  | 7.02%  | 6.65% | 4.00%         | 0.42%        | 2.12% | 3.45%         | 0.53% | 0.75%   | 0.04%       | 0.18%    | 0.13%           | 0.40%  | 1.37% |
| NP13                | 13      | early             | 3.09%            | 19.04%       | 40.14%           | 9.50%        | 0.44%  | 9.14%  | 1.85% | 2.54%         | 1.85%        | 2.78% | 5.72%         | 0.56% | 0.89%   | 0.00%       | 0.44%    | 0.08%           | 0.68%  | 2.25% |
| NP126               | 14      | mid               | 5.49%            | 20.91%       | 31.78%           | 7.83%        | 0.58%  | 11.33% | 3.04% | 2.69%         | 0.35%        | 0.70% | 5.84%         | 3.86% | 1.75%   | 0.00%       | 1.05%    | 0.23%           | 0.70%  | 1.87% |
| NP21                | 14      | mid               | 2.24%            | 18.16%       | 20.85%           | 21.30%       | 0.22%  | 12.11% | 1.79% | 1.35%         | 4.93%        | 4.48% | 8.30%         | 1.12% | 0.45%   | 0.00%       | 0.90%    | 0.00%           | 0.67%  | 1.12% |
| NP70                | 14      | mid               | 2.32%            | 16.86%       | 30.74%           | 14.96%       | 0.98%  | 10.88% | 3.56% | 3.61%         | 3.40%        | 3.04% | 2.94%         | 0.83% | 1.03%   | 3.20%       | 0.15%    | 0.15%           | 0.41%  | 0.93% |
| NP109               | 15      | mid               | 1.13%            | 17.80%       | 21.60%           | 20.20%       | 0.67%  | 14.80% | 2.47% | 3.93%         | 1.27%        | 6.53% | 5.33%         | 0.27% | 0.60%   | 0.00%       | 0.60%    | 0.13%           | 0.47%  | 2.20% |
| NP116               | 15      | mid               | 2.37%            | 16.70%       | 25.32%           | 21.74%       | 0.89%  | 15.61% | 1.98% | 3.06%         | 0.49%        | 2.37% | 8.40%         | 0.30% | 0.40%   | 0.00%       | 0.49%    | 0.20%           | 0.30%  | 1.19% |
| NP153               | 15      | mid               | 3.05%            | 11.07%       | 30.73%           | 11.15%       | 1.15%  | 5.34%  | 3.44% | 1.72%         | 16.03%       | 8.34% | 16.59%        | 0.38% | 0.17%   | 0.21%       | 0.38%    | 0.17%           | 2.61%  | 1.88% |
| NP154               | 15      | mid               | 1.63%            | 16.33%       | 16.53%           | 19.45%       | 0.36%  | 9.69%  | 1.08% | 3.55%         | 0.96%        | 9.51% | 1.60%         | 0.60% | 0.90%   | 1.69%       | 0.42%    | 0.06%           | 2.41%  | 1.09% |
| NP36                | 15      | mid               | 1.15%            | 12.01%       | 24.52%           | 21.58%       | 0.38%  | 17.24% | 1.66% | 1.28%         | 7.28%        | 1.02% | 6.51%         | 1.40% | 1.38%   | 0.26%       | 1.02%    | 0.00%           | 0.77%  | 1.53% |
| NP24                | 16      | mid               | 1.43%            | 22.81%       | 10.90%           | 25.68%       | 0.14%  | 16.50% | 2.73% | 0.43%         | 5.16%        | 1.29% | 7.75%         | 1.29% | 0.43%   | 0.00%       | 0.14%    | 0.14%           | 0.29%  | 1.87% |
| NP55                | 16      | mid               | 3.87%            | 13.80%       | 32.21%           | 14.73%       | 0.70%  | 8.25%  | 5.45% | 5.87%         | 0.33%        | 4.10% | 6.57%         | 0.56% | 1.49%   | 0.00%       | 0.42%    | 0.05%           | 0.61%  | 0.98% |
| NP122               | 17      | mid               | 2.64%            | 24.09%       | 20.01%           | 18.48%       | 0.41%  | 13.74% | 4.13% | 2.72%         | 0.87%        | 1.53% | 4.46%         | 1.16% | 0.99%   | 0.00%       | 1.11%    | 0.00%           | 1.65%  | 2.02% |
| NP17                | 17      | mid               | 2.88%            | 20.88%       | 23.38%           | 21.69%       | 0.55%  | 14.81% | 7.51% | 2.13%         | 1.0%         | 4.89% | 0.90%         | 0.62% | 0.00%   | 0.48%       | 0.00%    | 0.68%           | 1.17%  | 1.76% |
| NP12                | 18      | mid               | 3.85%            | 19.46%       | 19.27%           | 15.82%       | 0.96%  | 12.41% | 0.77% | 2.05%         | 0.88%        | 1.35% | 7.13%         | 1.93% | 0.19%   | 0.00%       | 1.00%    | 0.58%           | 0.39%  | 2.89% |
| NP142               | 18      | mid               | 4.19%            | 10.03%       | 33.50%           | 10.79%       | 0.76%  | 8.50%  | 3.05% | 1.78%         | 6.22%        | 1.90% | 9.90%         | 1.52% | 0.76%   | 0.19%       | 1.02%    | 0.00%           | 0.76%  | 1.14% |
| NP145               | 18      | mid               | 1.22%            | 17.44%       | 15.68%           | 24.33%       | 0.84%  | 17.06% | 1.15% | 1.07%         | 3.44%        | 3.52% | 8.57%         | 1.07% | 0.46%   | 2.22%       | 0.46%    | 0.00%           | 0.31%  | 1.15% |
| NP146               | 18      | mid               | 2.73%            | 17.99%       | 24.86%           | 22.90%       | 0.65%  | 13.96% | 2.40% | 0.22%         | 4.47%        | 0.76% | 3.60%         | 1.42% | 1.09%   | 0.00%       | 0.87%    | 0.33%           | 1.09%  | 0.65% |
| NP64                | 18      | mid               | 1.67%            | 17.37%       | 25.64%           | 19.80%       | 1.27%  | 9.06%  | 2.77% | 4.27%         | 2.31%        | 3.81% | 6.12%         | 0.52% | 1.27%   | 0.06%       | 1.21%    | 0.12%           | 0.98%  | 1.39% |
| NP19                | 19      | mid               | 0.76%            | 15.73%       | 26.94%           | 20.70%       | 2.59%  | 14.61% | 0.61% | 0.00%         | 5.18%        | 0.76% | 6.85%         | 1.22% | 0.76%   | 0.00%       | 1.52%    | 0.00%           | 0.30%  | 1.83% |
| NP100               | 19      | mid               | 1.80%            | 17.80%       | 13.26%           | 13.18%       | 0.26%  | 13.45% | 3.83% | 1.42%         | 0.52%        | 1.31% | 8.88%         | 0.52% | 1.31%   | 0.88%       |          |                 |        |       |

**Supplementary Table 3A. The number of single cells and pseudocells in the training dataset and the independent testing dataset, with the number of features selected by Lasso**

| Cell type        | Total single cells(N) | Training dataset |                 | Independent testing dataset |                 | Selected Features by Lasso (N) |
|------------------|-----------------------|------------------|-----------------|-----------------------------|-----------------|--------------------------------|
|                  |                       | Single cells (N) | Pseudocells (N) | Single cells (N)            | Pseudocells (N) |                                |
| CD8+ cytotoxic T | 47043                 | 32930            | 3234            | 14113                       | 131             | 1615                           |
| CD8+ Naive T     | 31258                 | 21880            | 2131            | 9378                        | 131             | 1335                           |
| CD4+ Naive T     | 30180                 | 21126            | 2055            | 9054                        | 131             | 1284                           |
| dnT              | 21240                 | 14868            | 1427            | 6372                        | 131             | 1044                           |
| NK               | 10875                 | 7612             | 710             | 3263                        | 131             | 600                            |
| MAIT             | 6775                  | 4742             | 434             | 2033                        | 131             | 447                            |
| Monocyte         | 4490                  | 3143             | 283             | 1347                        | 131             | 309                            |
| Memory B cell    | 4460                  | 3122             | 290             | 1338                        | 129             | 325                            |
| Naive B cell     | 4426                  | 3097             | 295             | 1328                        | 129             | 275                            |
| CD4+ Cytotoxic T | 4348                  | 3043             | 271             | 1305                        | 131             | 286                            |
| Treg             | 2587                  | 1810             | 171             | 777                         | 129             | 185                            |
| NK_CD56bright    | 1431                  | 995              | 125             | 427                         | 120             | 139                            |
| NKT              | 1372                  | 957              | 130             | 411                         | 123             | 132                            |
| Proliferative T  | 1268                  | 884              | 131             | 380                         | 126             | 147                            |

**Supplementary Table 3B. RMSE values calculated by 14 cell-type-specific models with the optimal hyperparameters determined by the 5-fold cross validation in the training dataset**

| Cell type        | Optimal hyperparameter* |                   |                  |           | RMSE   |       |
|------------------|-------------------------|-------------------|------------------|-----------|--------|-------|
|                  | n_estimators            | min_samples_split | min_samples_leaf | max_depth | mean   | std   |
| CD8+ cytotoxic T | 100                     | 2                 | 2                | 190       | 14.730 | 0.407 |
| CD8+ Naive T     | 100                     | 2                 | 1                | 65        | 14.871 | 0.327 |
| CD4+ Naive T     | 100                     | 2                 | 1                | 65        | 15.293 | 0.372 |
| dnT              | 70                      | 2                 | 2                | 195       | 17.097 | 0.781 |
| NK               | 100                     | 2                 | 1                | 65        | 15.975 | 0.328 |
| MAIT             | 100                     | 2                 | 2                | 190       | 20.134 | 1.826 |
| Monocyte         | 100                     | 2                 | 1                | 15        | 21.252 | 1.495 |
| Memory B cell    | 80                      | 5                 | 1                | 165       | 23.483 | 1.612 |
| Naive B cell     | 55                      | 5                 | 2                | 30        | 25.051 | 1.414 |
| CD4+ Cytotoxic T | 100                     | 2                 | 1                | 65        | 20.875 | 0.728 |
| Treg             | 85                      | 5                 | 2                | 175       | 25.349 | 0.996 |
| NK_CD56bright    | 85                      | 5                 | 2                | 175       | 25.871 | 3.671 |
| NKT              | 30                      | 2                 | 2                | 160       | 26.990 | 3.161 |
| Proliferative T  | 60                      | 2                 | 4                | 20        | 33.395 | 2.372 |

\*hyperparameter space:

n\_estimators = [10, 20, 30, ..., 100],

max\_depth = [10, 15, 20, ..., 205],

min\_samples\_split = [2, 5, 10],

min\_samples\_leaf = [1, 2, 4],

All other hyperparameters were configured with default values in the scikit-learn library.
